# Supplementary material for: Smoking Cessation Therapy is a Cost-Effective&nbsp;Intervention to Avoid Tooth Loss in Subjects With Periodontitis – An Economic Evaluation&nbsp;
Source: Research Square preprint supplement (doi:10.21203/rs.3.rs-228724/v1), 2021-02-23
Supplement: Supplementary file 2 [file 8d8ac52db19a8f91d6af5d12.docx]

Supplementary file 03: Expected costs, outcomes, cost-effectiveness, cost-utility based on deterministic model by varying each variable from a minimum (green) to a maximum (red) values

| **Variables** | **Value** | **Incremental Cost ($)** | **Incremental Effectiveness§** | **Incremental**  **QALYs** |
| --- | --- | --- | --- | --- |
| Cost of maintenance therapy in smokers | 94.78 | -28 | 0.58 | 0.50 |
| 115.86 | -166 |
| Cost of maintenance therapy in former smokers | 47.39 | -133 | 0.58 | 0.50 |
| 57.93 | -61 |
| Cost of SCT | 185.86 | -138 | 0.58 | 0.50 |
| 355.73 | -32 |
| 525.59 | 201 |
| Probability of tooth loss in non-smokers | 0.0003 | -148 | 0.06 | 0.05 |
| 0.005 | -63 | 0.91 | 0.78 |
| Probability of losing a tooth and not rehabilitate | 0.00 | 102 | 0.58* | 0.46 |
| 0.41 | 79 | 0.58* | 0.64 |
| Discount rate | 1.03 | -91 | 0.58 | 0.50 |
| 1.07 | -103 |
| Utility periodontitis | 0.67 | -97 | ----- | 0.50* |
| 0.89 | 0.50* |
| Utility after periodontal treatment | 0.76 | -97 | ----- | 0.47 |
| 0.96 | 0.53 |
| Utility maintenance therapy | 0.85 | -97 | ----- | 0.48 |
| 0.98 | 0.51 |
| Utility tooth loss and no rehabilitation | 0.55 | -97 | ----- | 0.50* |
| 0.67 | 0.50* |
| Utility tooth loss and removable partial prosthesis | 0.62 | -97 | ----- | 0.50* |
| 0.76 | 0.50* |
| *Although category values have been varied, there was no clinically relevant change in effectiveness values probably due to the small differences between both extremes (differences could be probably observed at level of many decimals- that is why they were not considered clinically relevant in this case)  § avoidance or prevention of tooth loss  QALY: Quality-adjusted life years | | | | |
