# Supplementary figures and images for: Smoking Cessation Therapy is a Cost-Effective&nbsp;Intervention to Avoid Tooth Loss in Subjects With Periodontitis – An Economic Evaluation&nbsp;
Source: Research Square preprint supplement (doi:10.21203/rs.3.rs-228724/v1), 2021-02-23

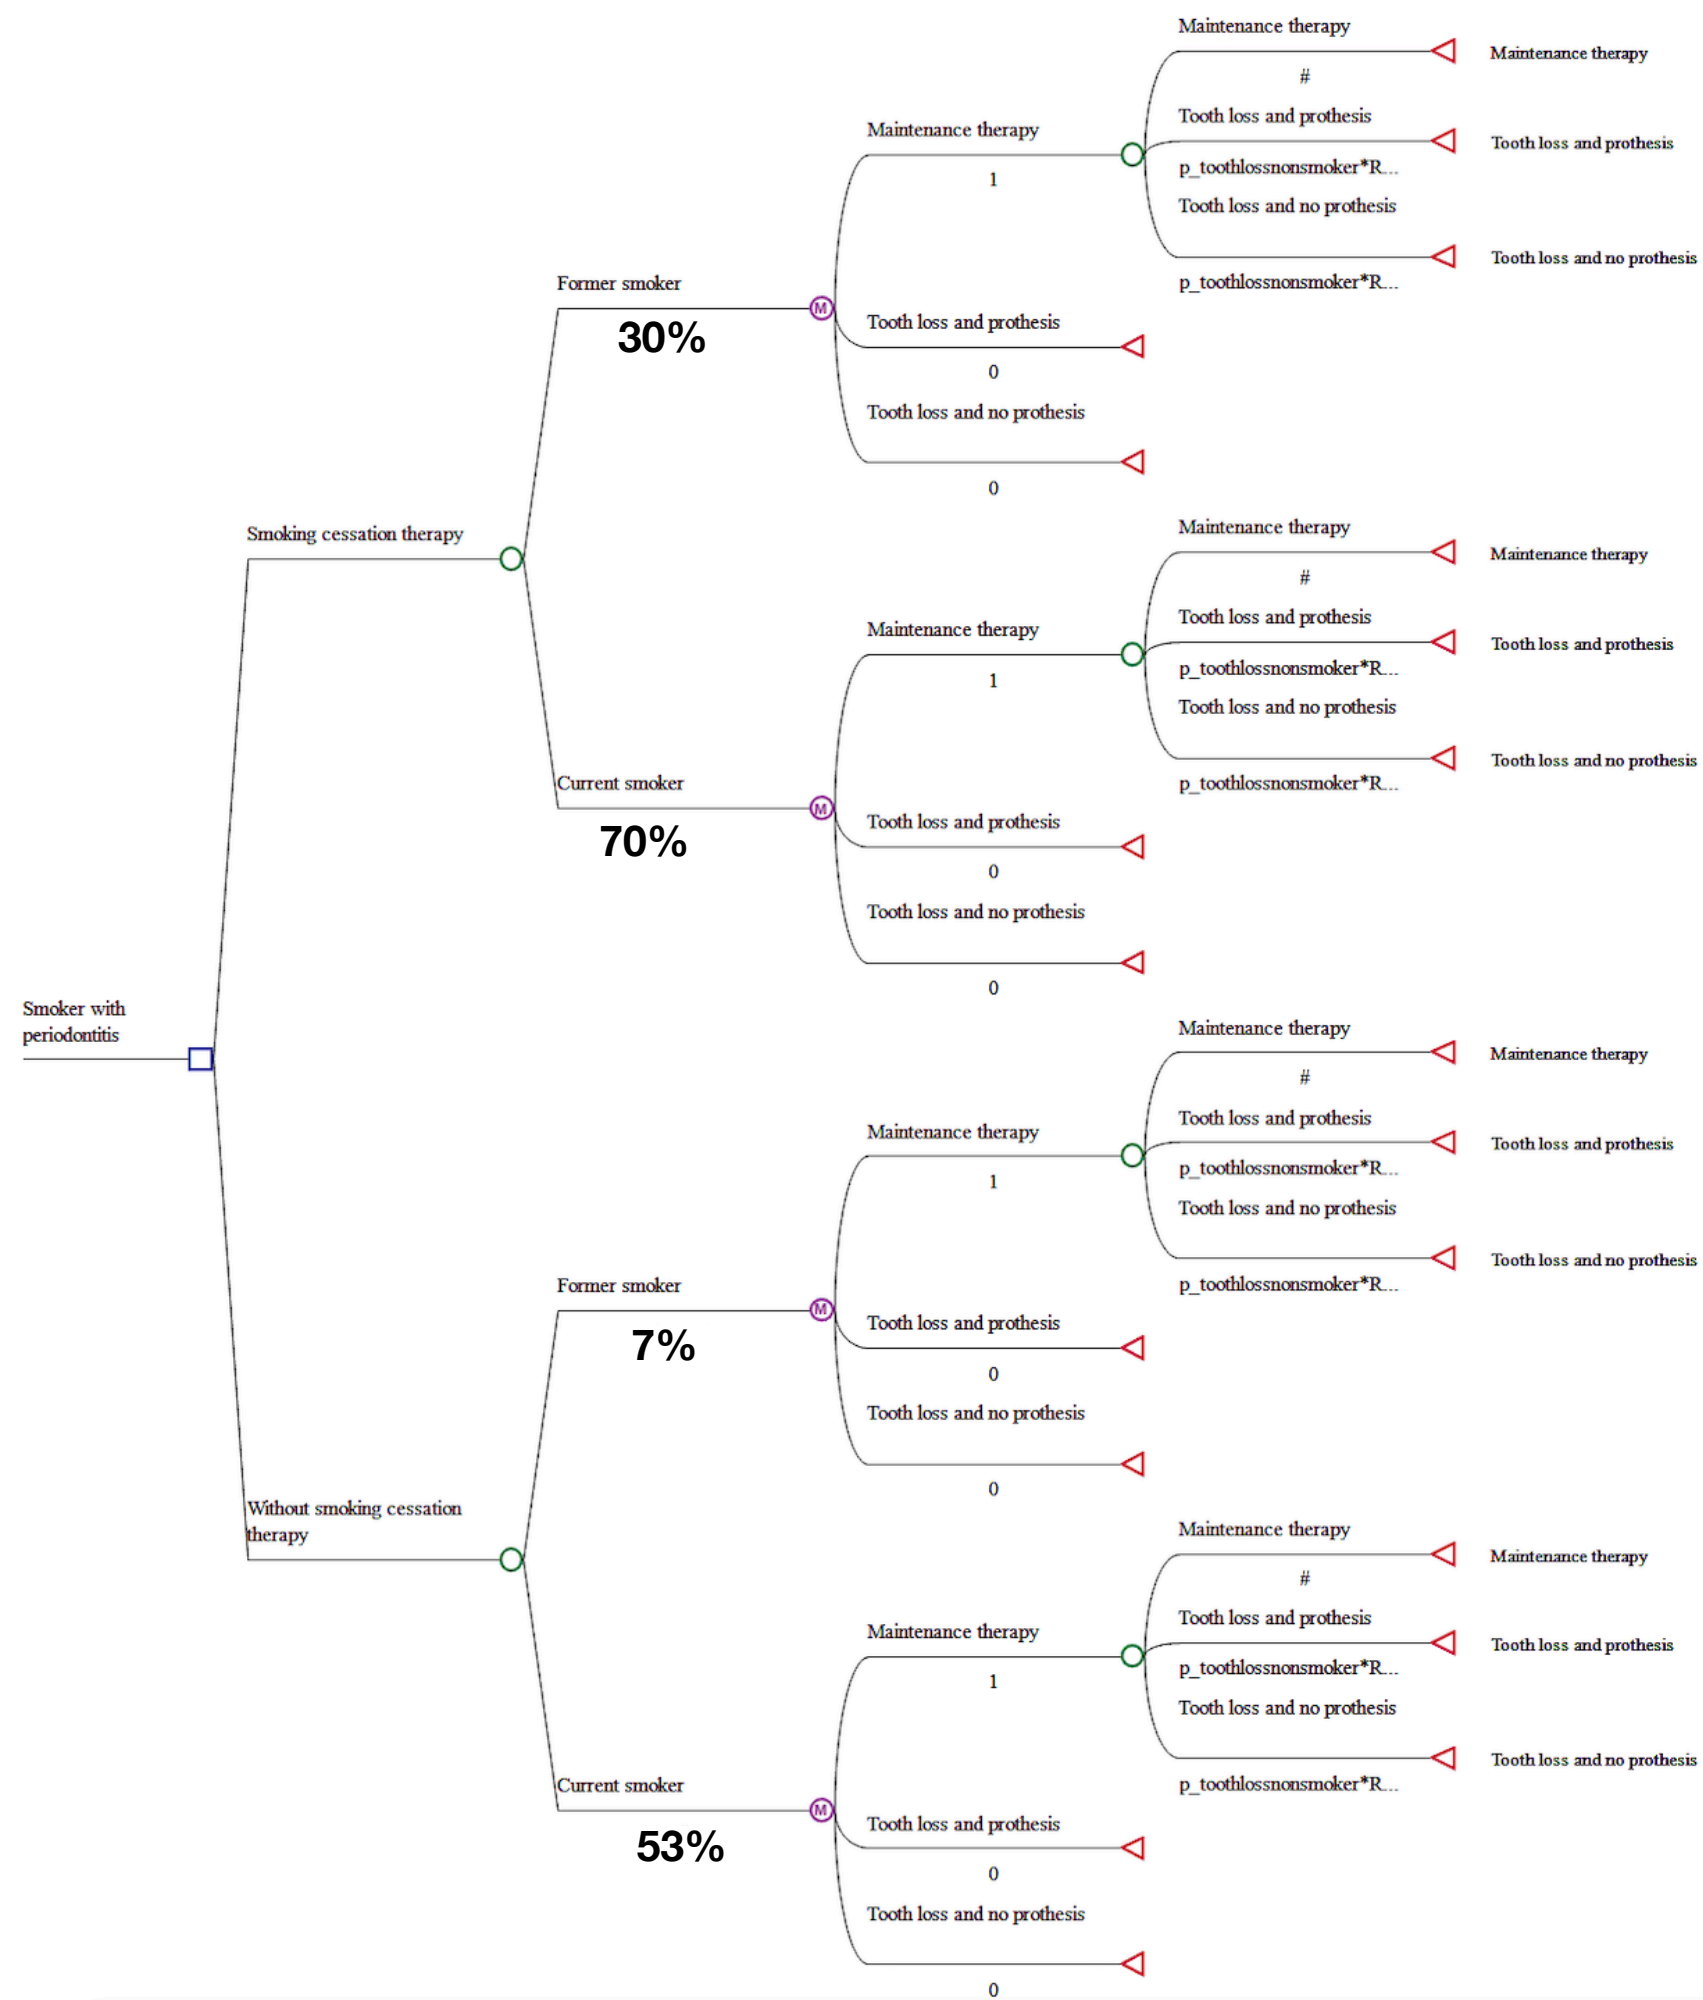

Supplement: Supplementary file 1 [file 827ffcec7ac57c9111012ee1.pdf]
